# Supplementary material for: Evolution of piggyBac Transposons in Apoidea
Source: MDPI journal article supplement (doi:10.3390/insects14040402), 2023-04-21
Supplement: s1 [file s1]

| Superfamily | Family      | Species                       | Length<br>(bp) | ORF (aa) | Copy number<br>(>80% identity<br>and > 40%<br>coverage ) | Copy<br>number of<br>intact Tns<br>( ≥500) | Size (bp)<br>Left/Right | TIR<br>(L/R)<br>Identity<br>% | TIR end (5 bp) | TSD  |
|-------------|-------------|-------------------------------|----------------|----------|----------------------------------------------------------|--------------------------------------------|-------------------------|-------------------------------|----------------|------|
| Apoidea     | Ampulicidae | <i>Ampulex compressa</i>      | 2380           | 552      | 3                                                        | 1                                          | 14/14                   | 85.71                         | CCGTT/TCGTT    | TTAA |
| Apoidea     | Andrenidae  | <i>Andrena dorsata</i>        | 3518           | 681      | 4                                                        | 3                                          | 5/5                     | 100                           | CCCTC/CCCTC    | TTAA |
| Apoidea     | Andrenidae  | <i>Andrena fulva</i>          | 2581           | 457      | 3                                                        | 0                                          | 17/17                   | 100                           | CCCGG/CCCGG    | TTAA |
| Apoidea     | Andrenidae  | <i>Andrena haemorrhoa</i>     | 777            | 83       | 236                                                      | 0                                          | 23/23                   | 100                           | GGTAA/GGTAA    | TAA  |
| Apoidea     | Andrenidae  | <i>Andrena minutula</i>       | 2519           | 560      | 2                                                        | 2                                          | 13/13                   | 100                           | CACTA/CACTA    | TTAA |
| Apoidea     | Apidae      | <i>Apis laboriosa</i>         | 471            | 32       | 27                                                       | 0                                          | 14/14                   | 92.86                         | CCCTT/TCCTT    | TTAA |
| Apoidea     | Apidae      | <i>Bombus bifarius</i>        | 3518           | 204      | 26                                                       | 0                                          | 201/191                 | 87.56                         | CACTA/CACTA    | TTAA |
| Apoidea     | Apidae      | <i>Bombus hypnorum</i>        | 2767           | 243      | 3                                                        | 0                                          | 16/16                   | 100                           | CACTA/CACTA    | TTAA |
| Apoidea     | Apidae      | <i>Bombus soroeensis</i>      | 2750           | 182      | 58                                                       | 0                                          | 14/14                   | 92.86                         | CACTA/TACTA    | TTAA |
| Apoidea     | Apidae      | <i>Bombus vosnesenskii</i>    | 1670           | 357      | 27                                                       | 0                                          | 15/15                   | 100                           | CACTA/CACTA    | TTAA |
| Apoidea     | Apidae      | <i>Bombus balteatus</i>       | 2468           | 184      | 16                                                       | 0                                          | 16/16                   | 93.75                         | CACTA/CACCA    | TAA  |
| Apoidea     | Apidae      | <i>Bombus confusus</i>        | 1942           | 142      | 35                                                       | 0                                          | 7/7                     | 85.71                         | CACTA/CCCTA    | TT-A |
| Apoidea     | Apidae      | <i>Bombus haemorrhoidalis</i> | 2288           | 555      | 1                                                        | 1                                          | 19/19                   | 73.68                         | CCTTA/CCTTT    | TAT  |
| Apoidea     | Apidae      | <i>Bombus huntii</i>          | 1869           | 96       | 16                                                       | 0                                          | 13/13                   | 92.31                         | CACTA/CACTA    | TAA  |
| Apoidea     | Apidae      | <i>Bombus ignitus</i>         | 2909           | 215      | 20                                                       | 0                                          | 16/16                   | 100                           | CACTA/CACTA    | TTAA |
| Apoidea     | Apidae      | <i>Bombus pratorum</i>        | 610            | 86       | 24                                                       | 0                                          | 13/13                   | 92.31                         | CACGT/CACGT    | TTAA |
| Apoidea     | Apidae      | <i>Bombus terrestris</i>      | 2713           | 547      | 86                                                       | 2                                          | 200/200                 | 95.5                          | CGGGA/CGGGA    | TT-A |
| Apoidea     | Apidae      | <i>Bombus turneri</i>         | 2478           | 340      | 35                                                       | 0                                          | 11/11                   | 100                           | CACTA/CACTA    | TTAA |
| Apoidea     | Apidae      | <i>Ceratina australensis</i>  | 2718           | 310      | 2                                                        | 0                                          | 15/15                   | 93.33                         | CACTA/CACTA    | TTAA |
| Apoidea     | Apidae      | <i>Ceratina calcarata</i>     | 3413           | 566      | 1                                                        | 1                                          | 14/12                   | 78.57                         | CGAGT/CGAGT    | T    |

|         |              |                                  |      |     |     |   |         |       |             |      |
|---------|--------------|----------------------------------|------|-----|-----|---|---------|-------|-------------|------|
| Apoidea | Apidae       | <i>Ctenoplectra terminalis</i>   | 2645 | 567 | 4   | 1 | 13/13   | 100   | CACTA/CACTA | TTAA |
| Apoidea | Apidae       | <i>Eufriesea mexicana</i>        | 450  | 93  | 335 | 0 | 12/12   | 91.67 | CCCAT/CCCAC | TTAA |
| Apoidea | Apidae       | <i>Euglossa dilemma</i>          | 2435 | 220 | 1   | 0 | 14/14   | 85.71 | CCTAG/CCCAG | TTAA |
| Apoidea | Apidae       | <i>Exoneura robusta</i>          | 1289 | 24  | 3   | 0 | 493/489 | 96.96 | CGCCG/CGCCG | TTAA |
| Apoidea | Apidae       | <i>Exoneurella tridentata</i>    | 2589 | 587 | 2   | 1 | 17/17   | 88.24 | CCTTC/CTCTT | TTAA |
| Apoidea | Apidae       | <i>Frieseomelitta varia</i>      | 3064 | 578 | 4   | 1 | 15/15   | 73.33 | TTTTG/GTTTG | TTAA |
| Apoidea | Apidae       | <i>Holcopasites calliopsidis</i> | 2569 | 612 | 8   | 8 | 14/14   | 100   | CCCTA/CCCTA | TTAA |
| Apoidea | Apidae       | <i>Habropoda laboriosa</i>       | 2422 | 583 | 1   | 1 | 13/13   | 100   | CACTA/CACTA | TTAA |
| Apoidea | Apidae       | <i>Nomada fabriciana</i>         | 2477 | 474 | 2   | 0 | 18/18   | 100   | CACTT/CACTT | TTAA |
| Apoidea | Apidae       | <i>Tetragonula davenporti</i>    | 1374 | 81  | 28  | 0 | 14/14   | 85.71 | CCCTT/CTCTT | TTAA |
| Apoidea | Apidae       | <i>Tetragonula hockingsi</i>     | 368  | 36  | 15  | 0 | 12/12   | 100   | CCCTT/CCCTT | TTAA |
| Apoidea | Colletidae   | <i>Colletes gigas</i>            | 2838 | 589 | 4   | 1 | 16/16   | 100   | CCTTC/CCTTC | TTAA |
| Apoidea | Crabronidae  | <i>Cerceris rybyensis</i>        | 2334 | 449 | 5   | 0 | 18/18   | 94.44 | CCTTT/CCTTT | TTAA |
| Apoidea | Crabronidae  | <i>Ectemnius continuus</i>       | 2519 | 601 | 9   | 2 | 15/15   | 100   | CACTA/CACTA | TTAA |
| Apoidea | Crabronidae  | <i>Mimumesa dahlbomi</i>         | 2667 | 596 | 4   | 2 | 16/16   | 100   | CACTA/CACTA | TTAA |
| Apoidea | Crabronidae  | <i>Nysson spinosus</i>           | 2712 | 535 | 10  | 4 | 13/13   | 100   | CACTA/CACTA | TTAA |
| Apoidea | Halictidae   | <i>Dufourea novaeangliae</i>     | 2596 | 477 | 6   | 0 | 15/15   | 93.33 | CCCTT/CCCTT | TTAA |
| Apoidea | Halictidae   | <i>Lasioglossum pauxillum</i>    | 2331 | 580 | 8   | 1 | 17/17   | 100   | CCCGC/CCCGC | TTAA |
| Apoidea | Halictidae   | <i>Seladonia tumulorum</i>       | 2326 | 567 | 1   | 1 | 13/13   | 92.31 | CCCTC/CCCTC | TTAA |
| Apoidea | Megachilidae | <i>Megachile willughbiella</i>   | 2868 | 569 | 6   | 3 | 15/15   | 100   | CCCAT/CCCAT | TTAA |
| Apoidea | Megachilidae | <i>Megachile rotundata</i>       | 2374 | 581 | 8   | 2 | 17/17   | 94.12 | CCCTT/CCCTT | TTAA |
| Apoidea | Megachilidae | <i>Osmia lignaria</i>            | 900  | 62  | 4   | 0 | 15/15   | 93.33 | CCCTC/CCCTC | TTAA |
| Apoidea | Megachilidae | <i>Stelis phaeoptera</i>         | 2292 | 206 | 1   | 0 | 20/20   | 100   | CCTTC/CCTTC | TTAA |
| Apoidea | Melittidae   | <i>Macropis europaea</i>         | 2646 | 567 | 6   | 4 | 13/13   | 100   | CACTA/CACTA | TTAA |

**Table S1.** Information about *piggyBac* (PB) elements in Apoidea.
