# Supplementary material for: Evolution of piggyBac Transposons in Apoidea
Source: MDPI journal article supplement (doi:10.3390/insects14040402), 2023-04-21
Supplement: s1 [file s1]

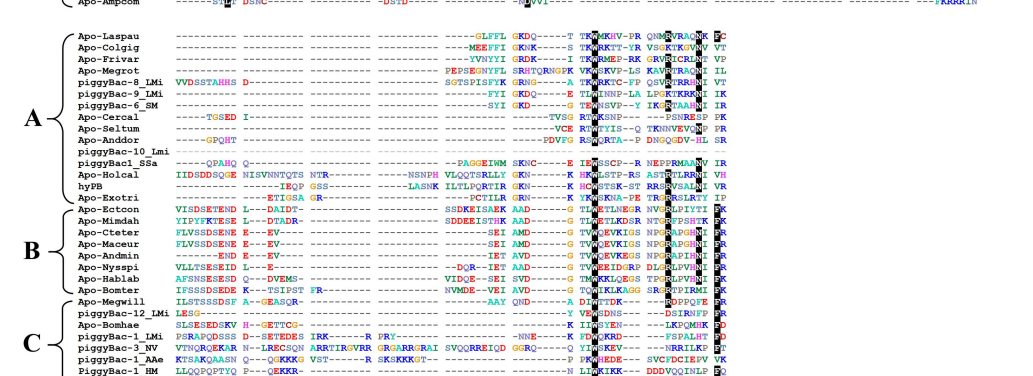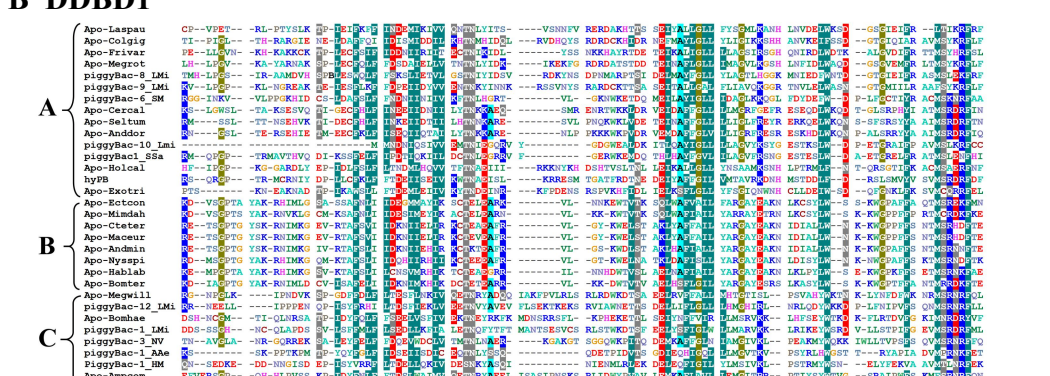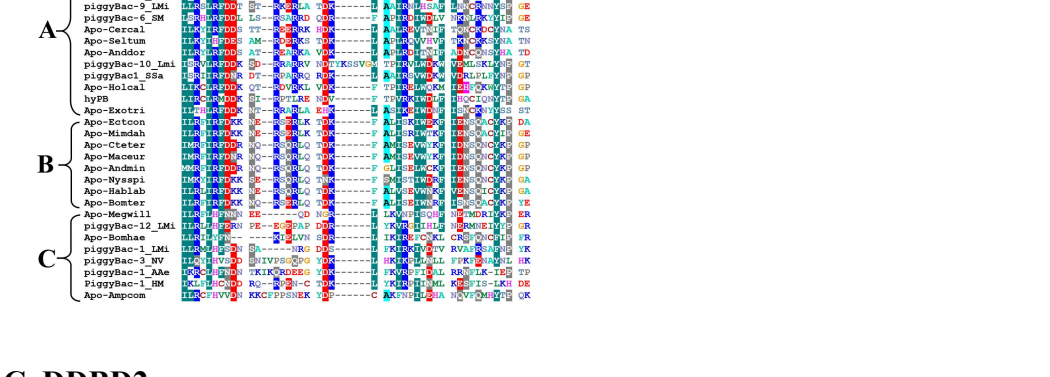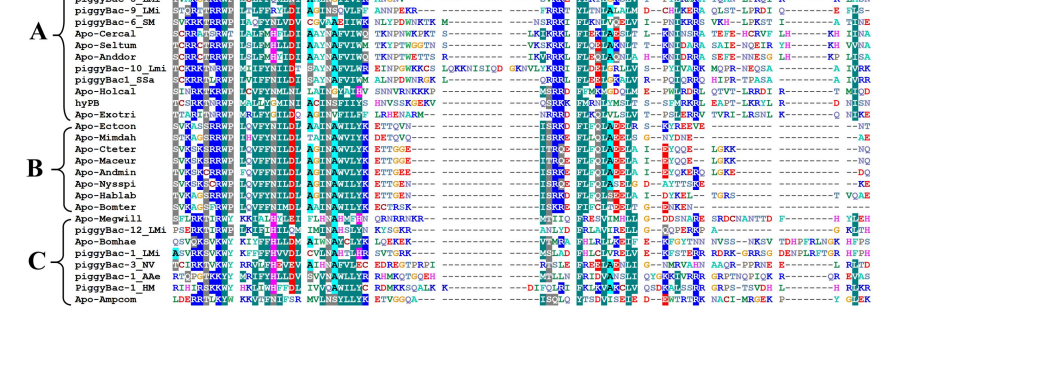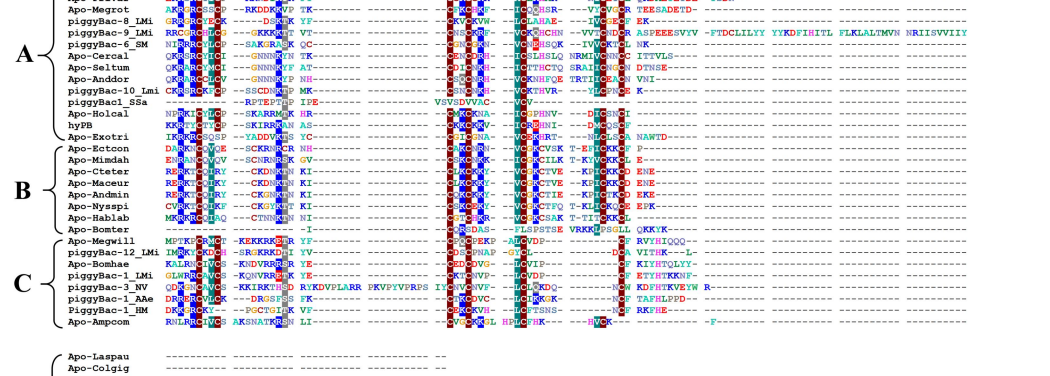

|   |                 |            |            |            |            |     |
|---|-----------------|------------|------------|------------|------------|-----|
|   | Apo-Filvar      | -----      | -----      | -----      | -----      | --- |
|   | Apo-Megrot      | -----      | -----      | -----      | -----      | --- |
| A | piggyBac-8 IMi  | -----      | -----      | -----      | -----      | --  |
|   | piggyBac-9 IMi  | LEFVIKVALT | KYPGNLCQTY | CNNFNPFMPH | LVMYTDIKKS | CC  |
|   | piggyBac-6 SM   | -----      | -----      | -----      | -----      | --  |
|   | Apo-Cercal      | -----      | -----      | -----      | -----      | --  |
|   | Apo-Seltum      | -----      | -----      | -----      | -----      | --  |
|   | Apo-Anddor      | -----      | -----      | -----      | -----      | --  |
| B | piggyBac-10 IMi | -----      | -----      | -----      | -----      | --  |
|   | piggyBac1 SSe   | -----      | -----      | -----      | -----      | --  |
|   | Apo-Holcal      | -----      | -----      | -----      | -----      | --  |
|   | hyfB            | -----      | -----      | -----      | -----      | --  |
|   | Apo-Ekxtri      | -----      | -----      | -----      | -----      | --  |
|   | Apo-Ectoon      | -----      | -----      | -----      | -----      | --  |
|   | Apo-Mimdah      | -----      | -----      | -----      | -----      | --  |
|   | Apo-Cteter      | -----      | -----      | -----      | -----      | --  |
|   | Apo-Maceaur     | -----      | -----      | -----      | -----      | --  |
|   | Apo-Andmin      | -----      | -----      | -----      | -----      | --  |
|   | Apo-Nyssapi     | -----      | -----      | -----      | -----      | --  |
|   | Apo-Babiab      | -----      | -----      | -----      | -----      | --  |
|   | Apo-Bonter      | -----      | -----      | -----      | -----      | --  |
|   | Apo-Megwill     | -----      | -----      | -----      | -----      | --  |
| C | piggyBac-12 IMi | -----      | -----      | -----      | -----      | --  |
|   | Apo-Romhae      | -----      | -----      | -----      | -----      | --  |
|   | piggyBac-1 IMi  | -----      | -----      | -----      | -----      | --  |
|   | piggyBac-3 NV   | -----      | -----      | -----      | -----      | --  |
|   | piggyBac-1 Jhe  | -----      | -----      | -----      | -----      | --  |
|   | PiggyBac-1 IM   | -----      | -----      | -----      | -----      | --  |
|   | Apo-Amptom      | -----      | -----      | -----      | -----      | --  |
