# Supplementary material for: Evolution of piggyBac Transposons in Apoidea
Source: MDPI journal article supplement (doi:10.3390/insects14040402), 2023-04-21
Supplement: s1 [file s1]

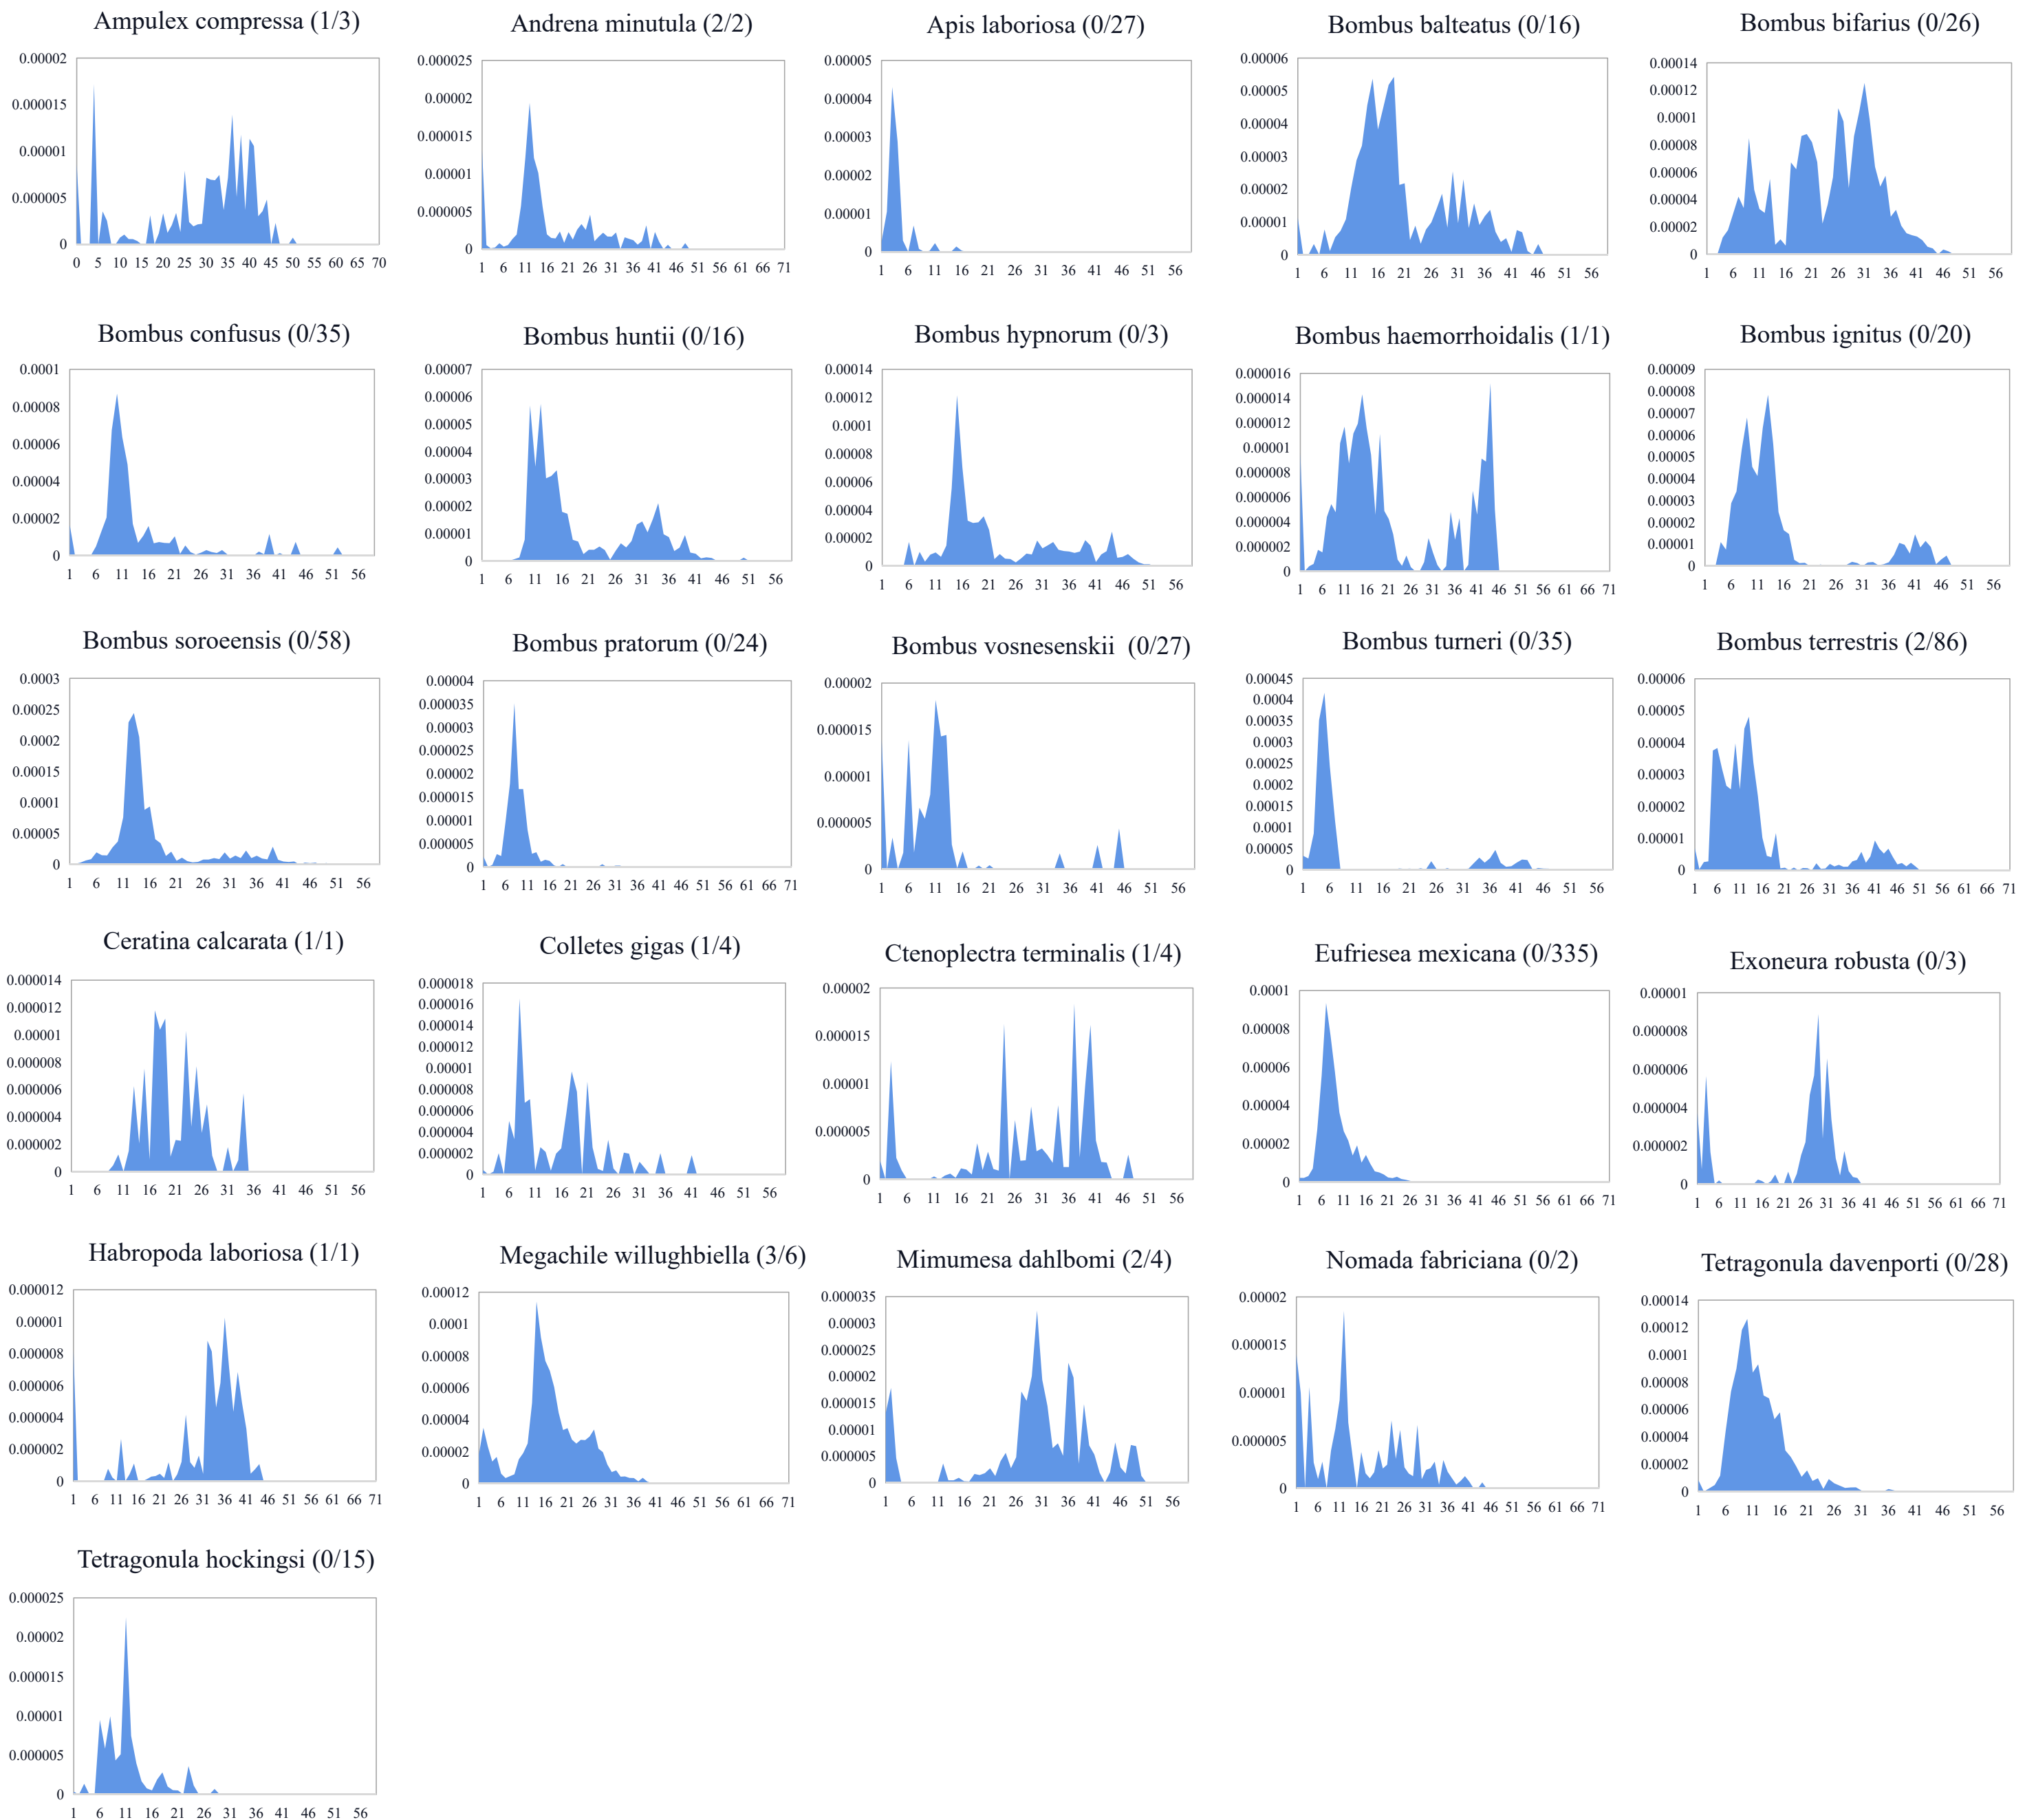

**Figure S3.** Evolutionary dynamics of *piggyBac* (PB) in Apoidea. The y-axis represents the coverage (%) of each PB transposon in the genome, and the x-axis indicates the K divergence estimate (%), while the numbers in blankets represent the intact copy number and total copy number of PB transposon in each genome. The figure only shows species with high K values. At the top of each chart are species names.
